# Supplementary material
Source: PubMed Central journal article supplement (PMC3365638)
Supplement: cr201183x2.pdf [file cr201183x2.pdf]

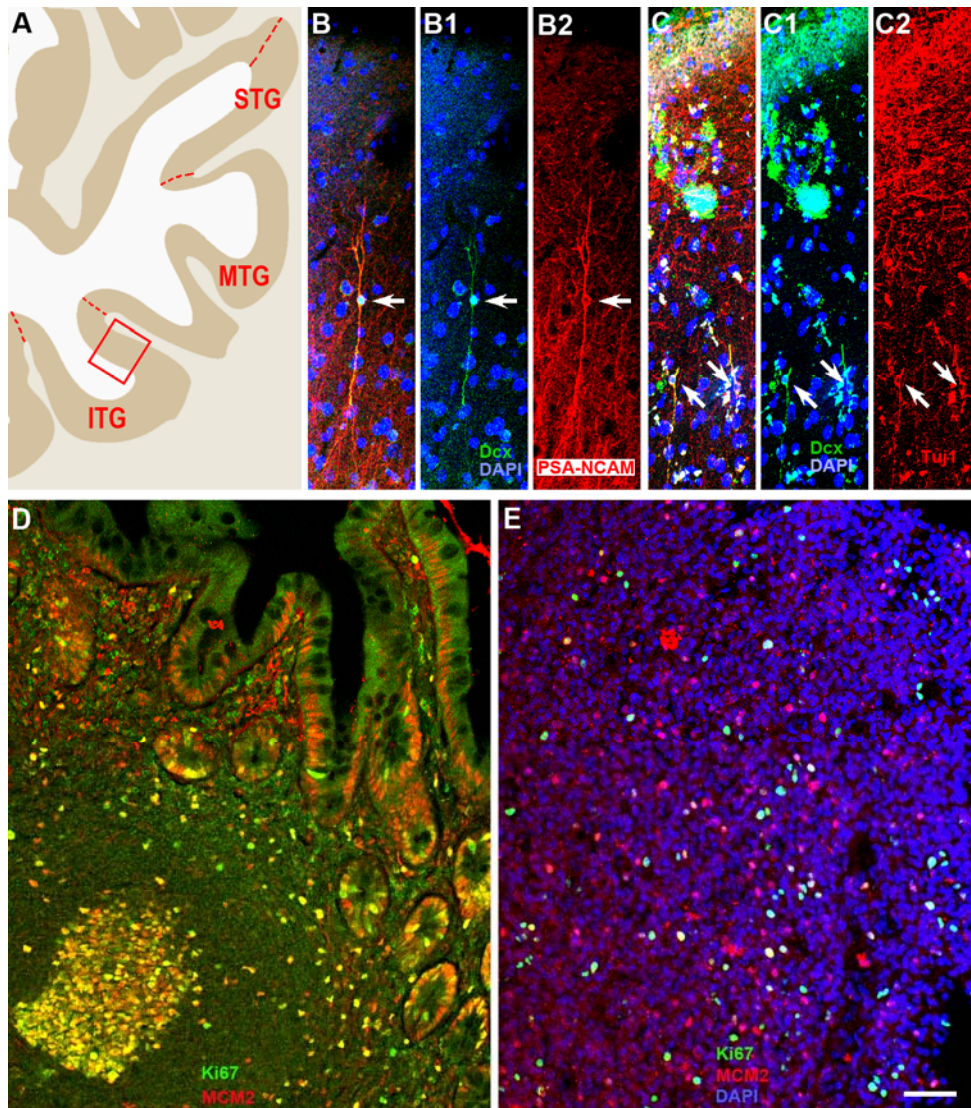

**Supplementary information, Figure S2** The antibodies used in the present study recognize specific human antigens. **(A)** The schematic drawing shows the temporoparietal cortical areas where Dcx<sup>+</sup> cells were found in previous studies. The tissue in the boxed area was used to establish the specificities of the Dcx (goat and rabbit polyclonal), PSA-NCAM and Tuj1 antibodies. **(B-B2)** One Dcx (goat polyclonal) +/PSA-NCAM<sup>+</sup> immature neuron (arrow). **(C-C2)** Two Dcx (rabbit polyclonal) +/Tuj1<sup>+</sup> immature neurons (arrows). **(D)** A large collection of Ki67<sup>+</sup>/MCM2<sup>+</sup> cells, including proliferating B cells in the lymph nodule, was found in the transverse section of the human jejunum. **(E)** Many Ki67<sup>+</sup>/MCM2<sup>+</sup> cells were found in a malignant glioblastoma section. Abbreviations: ITG, inferior temporal gyrus; MTG, middle temporal gyrus; STG, superior temporal gyrus. Scale bar represents 50  $\mu\text{m}$  (in **E** applies to **B-E**).
