# Supplementary material
Source: PubMed Central journal article supplement (PMC3365638)
Supplement: cr201183x4.pdf [file cr201183x4.pdf]

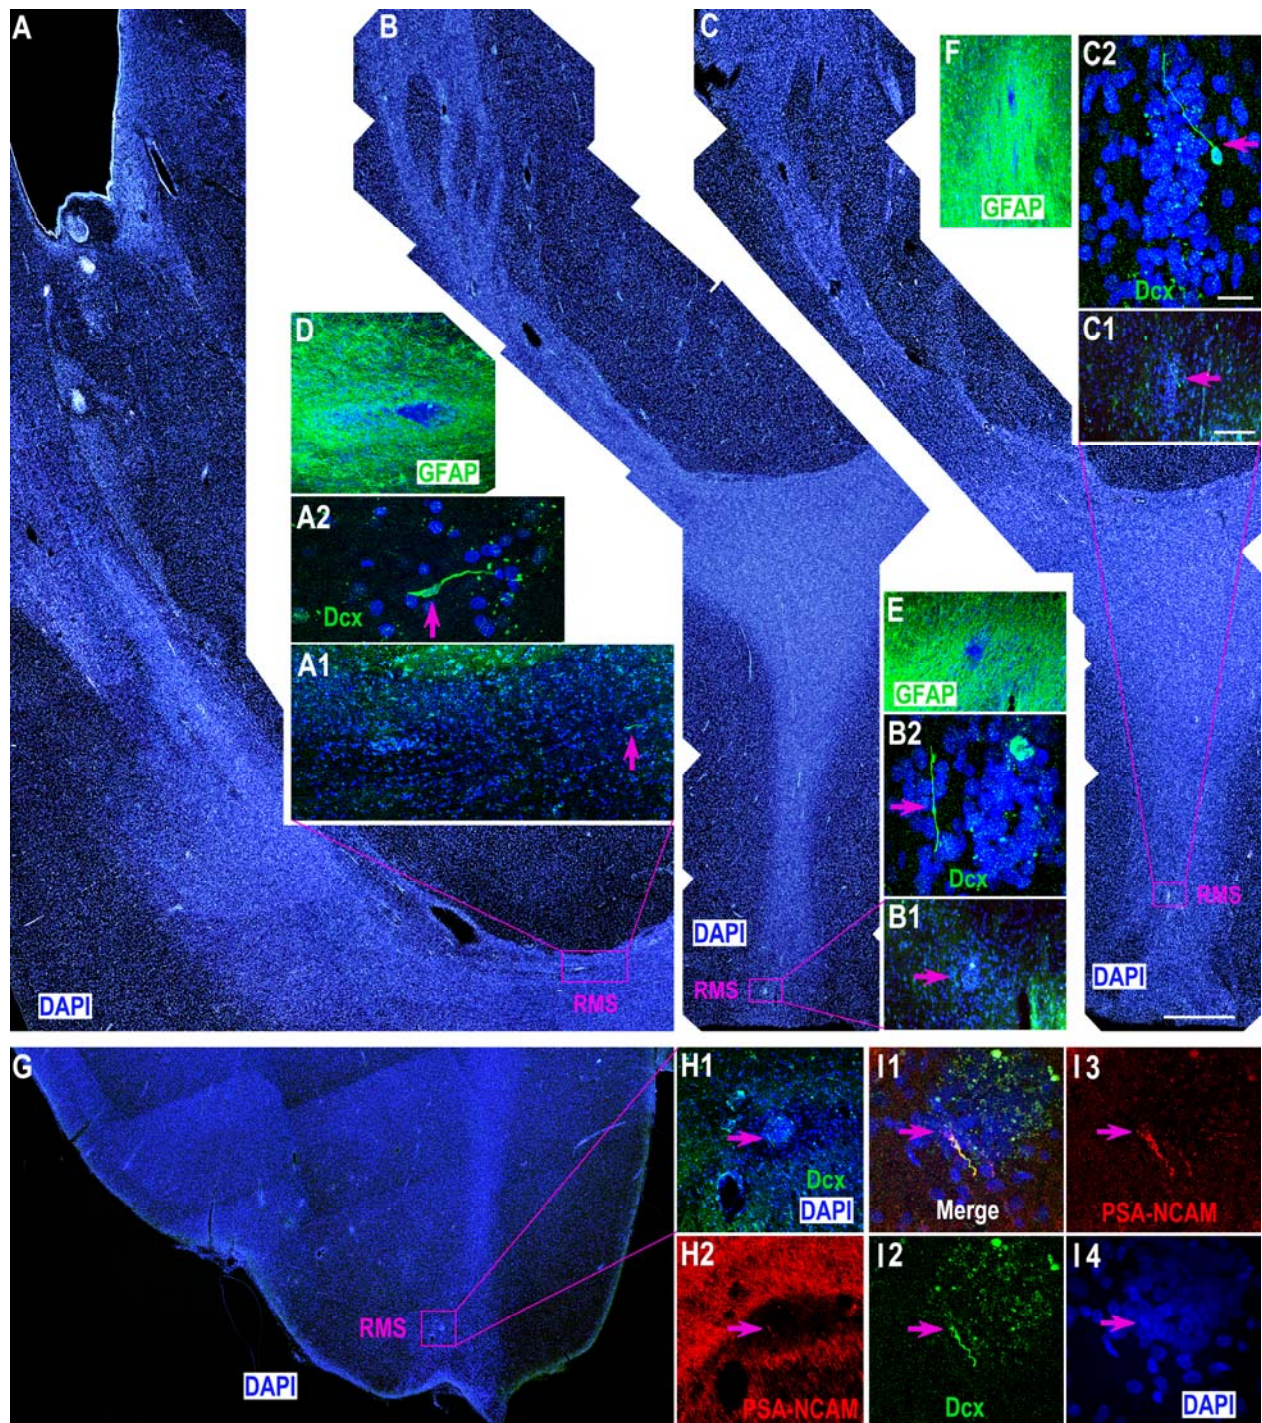

**Supplementary information, Figure S4** Dcx<sup>+</sup> cells exist in the rostral limb of the RMS of the adult human brain. (A) DAPI staining shows the RMS beneath the caudate nucleus. (A1 and A2) One Dcx<sup>+</sup> cell in the boxed area in (A) (arrows). (B, C and G) DAPI staining shows the rostral limb of the RMS. Note that the RMS in (B) is starting to enter the olfactory tract. (B1, B2, C1 and C2) The Dcx<sup>+</sup> process and cell in the boxed areas in (B and C) respectively (arrows). (D-F) GFAP immunostaining in same region of (A1, B1 and C1). (H1-I4) One Dcx<sup>+</sup>/PSA-NCAM<sup>+</sup> cell in the boxed area in (G) (arrows). Scale bars represent 1 mm (in C applies to A-C and G); 100  $\mu$ m (in C1 applies to A1, B1, C1, D-F, H1 and H2) and 20  $\mu$ m (in C2 applies to A2, B2, C2 and I1-I4).
