# Supplementary material
Source: PubMed Central journal article supplement (PMC3365638)
Supplement: cr201183x5.pdf [file cr201183x5.pdf]

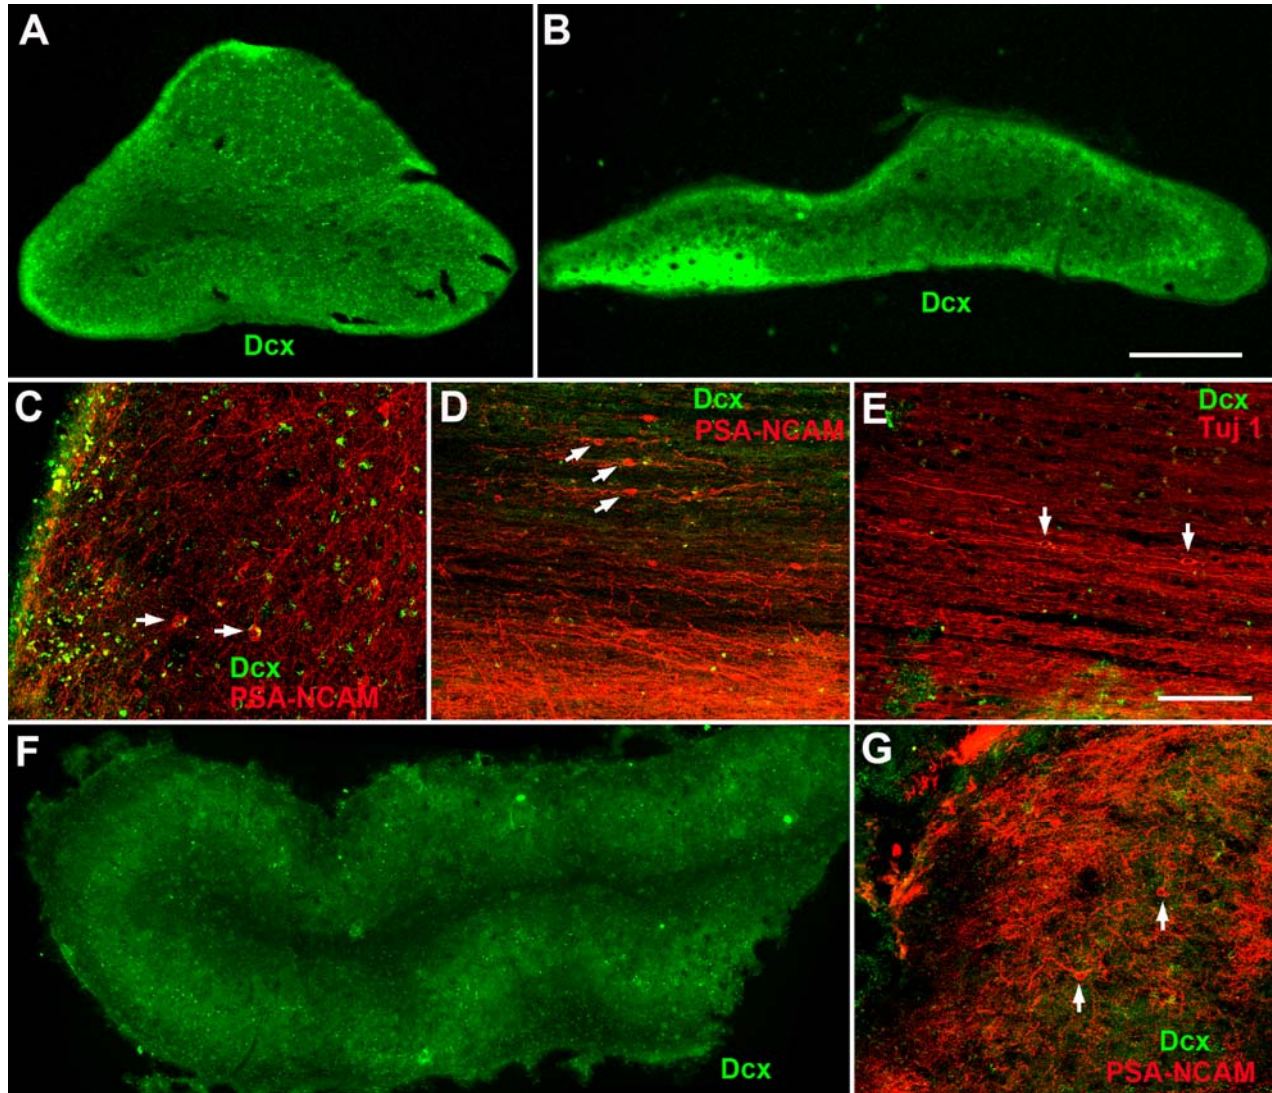

**Supplementary information, Figure S5** Most PSA-NCAM<sup>+</sup> and Tuj1<sup>+</sup> cells do not express Dcx in the adult human olfactory tract and OB. (A, B and F) Dcx immunostaining in the coronal sections of the posterior, anterior olfactory tract and OB. (C) Dcx/PSA-NCAM double-immunostaining in a coronal section of the olfactory tract. (D, E) Dcx/PSA-NCAM and Dcx/Tuj1 double-immunostaining in the longitudinal sections of the olfactory tract. (G) Dcx/PSA-NCAM double-immunostaining in a coronal section of the OB. Note that while PSA-NCAM<sup>+</sup> or Tuj1<sup>+</sup> cells (arrows) are abundant in the olfactory tract and OB, they do not express Dcx. Scale bars represent 500  $\mu$ m (in B applies to A, B and F) and 100  $\mu$ m (in E applies to C-E and G).
